# Supplementary material
Source: Royal Society of Chemistry journal article supplement (doi:10.1039/d5ta08841k)
Supplement: d5ta08841k1.pdf [file d5ta08841k1.pdf]

# Deep Learning Framework for Accurate Prediction and High-Throughput Search of the Thermoelectric Figure of Merit in Skutterudites

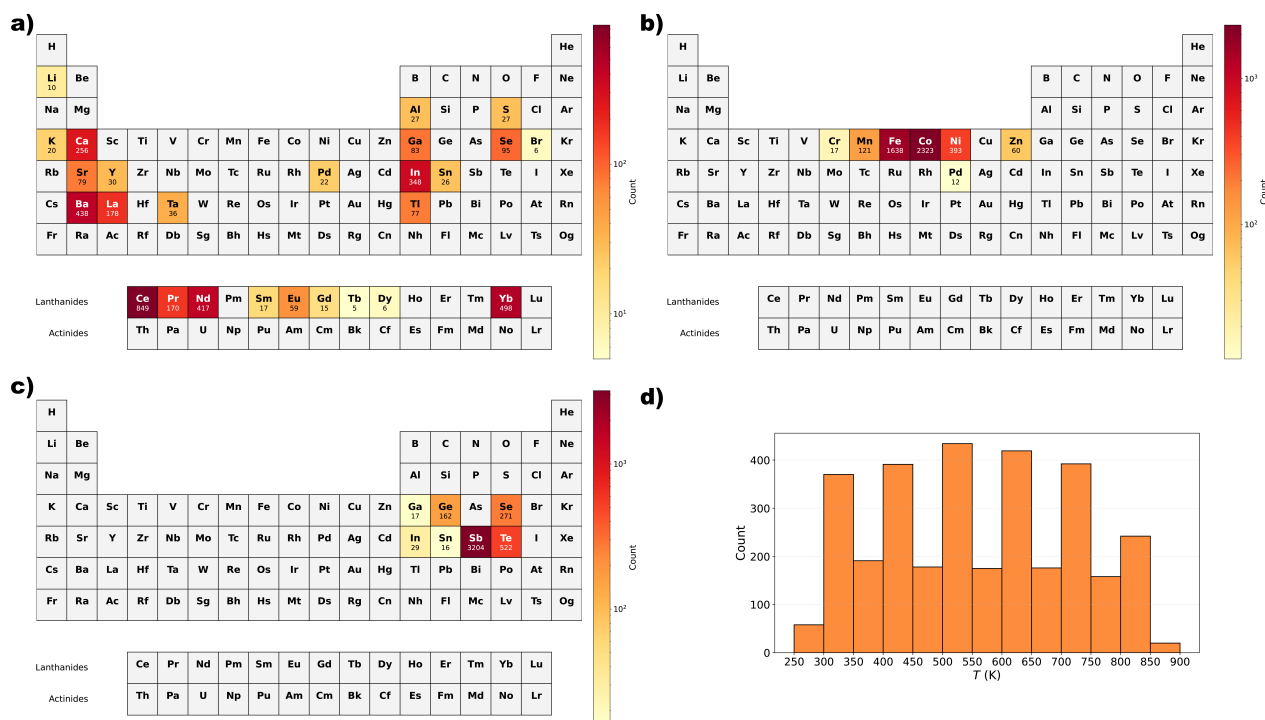

Figure S1. Compositional variability for training set of a) fillers, b) cations and c) anions. d) Temperature histogram of the training dataset.

Table S1. List of all descriptors used in the model, including structural, electronic, thermal and compositional features.

| Structural Composition |                                                          |
|------------------------|----------------------------------------------------------|
| Descriptor             | Meaning                                                  |
| num_anions             | Number of anion species                                  |
| num_cations            | Number of cation species                                 |
| num_fillers            | Number of filler species                                 |
| Electronegativity      |                                                          |
| aver_a_elecneg         | Average electronegativity of anions                      |
| dev_a_elecneg          | Standard deviation of electronegativity among anions     |
| aver_c_elecneg         | Average electronegativity of cations                     |
| dev_c_elecneg          | Standard deviation of electronegativity among cations    |
| aver_f_elecneg         | Average electronegativity of fillers                     |
| dev_f_elecneg          | Standard deviation of electronegativity among fillers    |
| Ionization Potential   |                                                          |
| aver_a_ip              | Average ionization potential of anions                   |
| dev_a_ip               | Standard deviation of ionization potential among anions  |
| aver_c_ip              | Average ionization potential of cations                  |
| dev_c_ip               | Standard deviation of ionization potential among cations |

|                                          |                                                          |
|------------------------------------------|----------------------------------------------------------|
| aver_f_ip                                | Average ionization potential of fillers                  |
| dev_f_ip                                 | Standard deviation of ionization potential among fillers |
| <b>Electron Affinity</b>                 |                                                          |
| aver_a_ea                                | Average electron affinity of anions                      |
| dev_a_ea                                 | Standard deviation of electron affinity among anions     |
| aver_c_ea                                | Average electron affinity of cations                     |
| dev_c_ea                                 | Standard deviation of electron affinity among cations    |
| aver_f_ea                                | Average electron affinity of fillers                     |
| dev_f_ea                                 | Standard deviation of electron affinity among fillers    |
| <b>Mass and Stoichiometry</b>            |                                                          |
| f_mass                                   | Total mass of filler atoms in the structure              |
| total_mass                               | Total atomic mass of all atoms in the system             |
| std_dev_f_mass                           | Standard deviation of atomic mass among filler species   |
| std_dev_a_mass                           | Standard deviation of atomic mass among anion species    |
| std_dev_c_mass                           | Standard deviation of atomic mass among cation species   |
| std_dev_f_frac                           | Standard deviation of atomic fraction among fillers      |
| std_dev_a_frac                           | Standard deviation of atomic fraction among anions       |
| std_dev_c_frac                           | Standard deviation of atomic fraction among cations      |
| sum_f_frac                               | Sum of atomic fractions of all filler species            |
| sum_a_frac                               | Sum of atomic fractions of all anion species             |
| sum_c_frac                               | Sum of atomic fractions of all cation species            |
| ratio_a_c                                | Ratio of the total atomic fraction of anions to cations  |
| <b>Electronic and Thermal Properties</b> |                                                          |
| total_val_e                              | Total number of valence electrons in the system          |
| n_300                                    | Carrier concentration at 300 K                           |
| T                                        | Temperature (K)                                          |
| p_n                                      | Carrier type (0 for p-type, 1 for n-type)                |
| ZT                                       | Thermoelectric figure of merit                           |

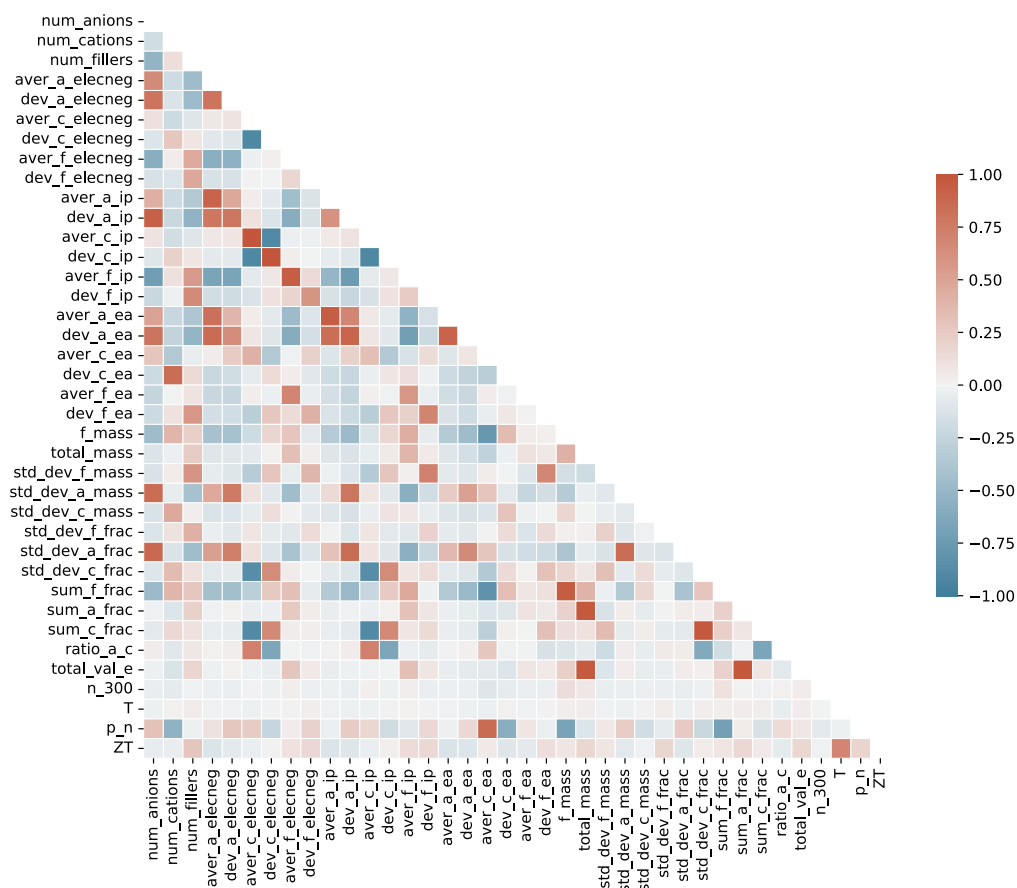

Figure S2. Pearson correlation matrix for all 37 descriptors and target  $zT$  used in model training.

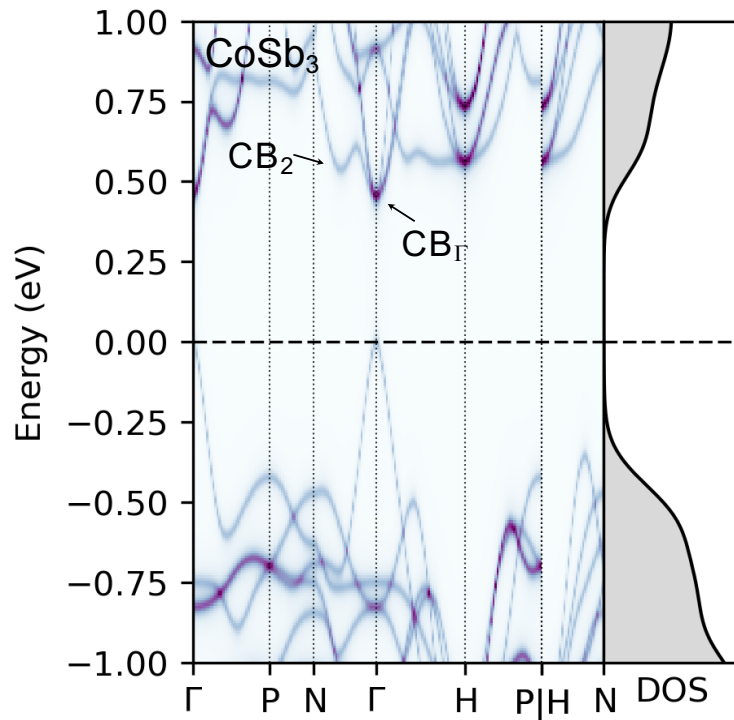

Figure S3. Unfolded band structure of pristine  $\text{CoSb}_3$  used as reference for comparison with doped systems.

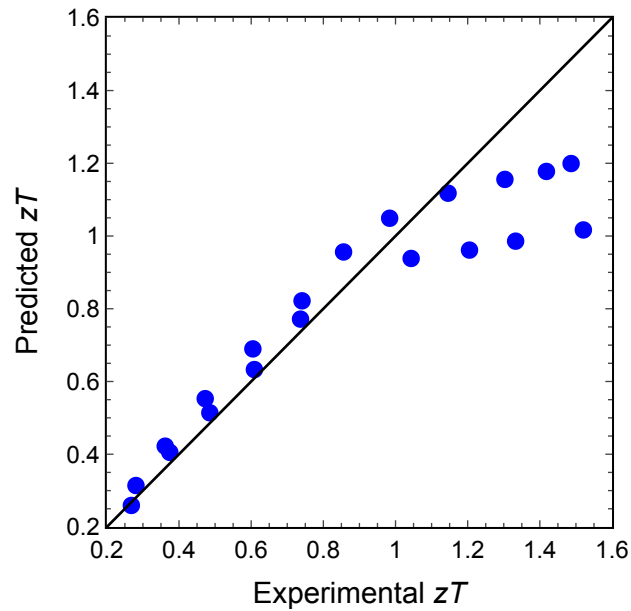

Figure S4. Predicted  $zT$  values for the  $\text{S}_{0.2}\text{Se}_{0.05}\text{CoSb}_{11.25-2x}\text{Te}_{0.75}(\text{GeTe})_x$  samples synthesized by Wang et al [1].

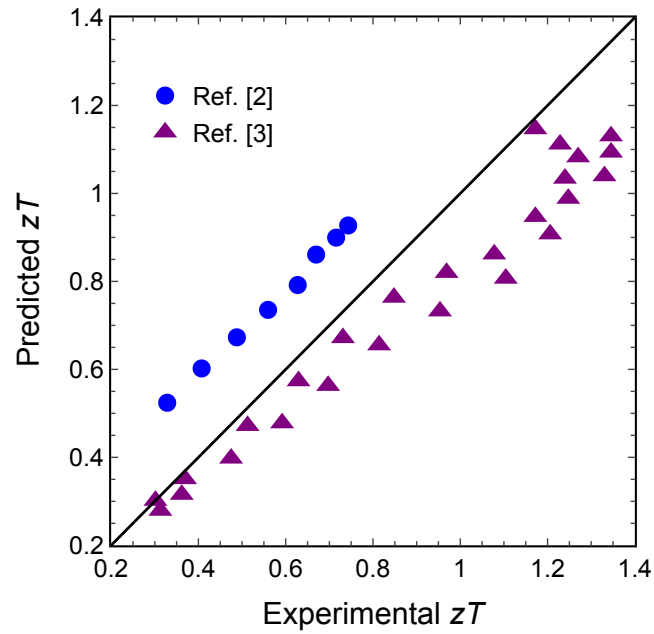

Figure S5. Predicted  $zT$  values for the composition  $Yb_{0.12}Ca_{0.15}Co_4Sb_{12.09}$  (blue dots) reported by Salvador et al. [2] and for the  $Y_xYb_{1-x}Co_4Sb_{12}$  (purple triangles) reported by Qin et al. [3].

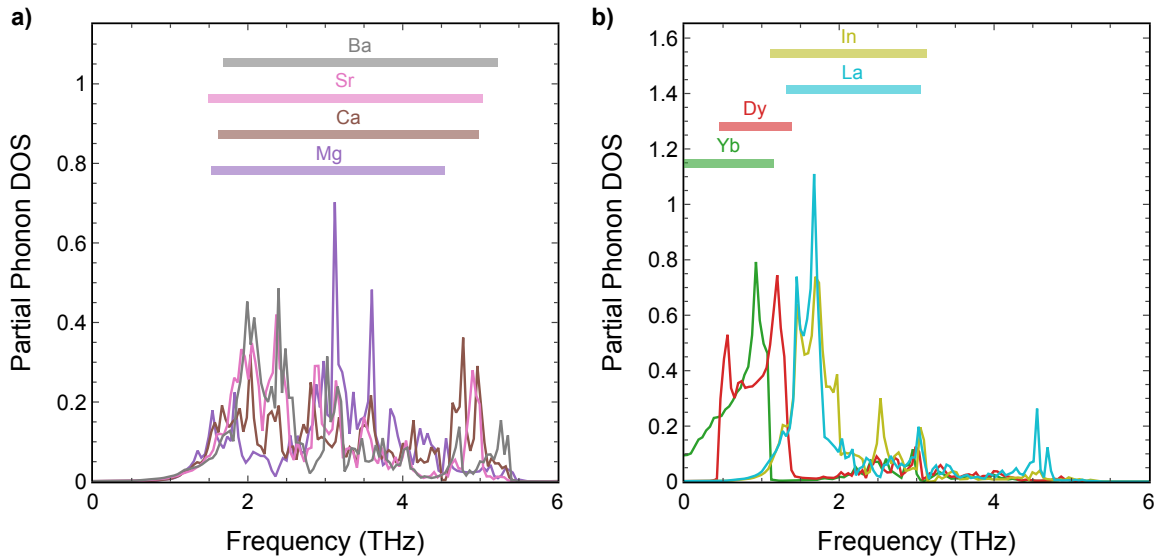

Figure S6. Projected phonon density of states for rattler atoms a) Mg (purple), Ca (brown), Sr (pink), Ba (grey), and b) Yb (green), Dy (red), In (yellow), La (light blue) in selected double-filled  $Co_4Sb_{12}$ -based skutterudites. The distinct peaks in the low-frequency region (<2 THz) in both a) and b) suggest localized vibrational modes. These results support the presence of dual-frequency resonant phonon scattering, as discussed in Figure 7 in the main text.

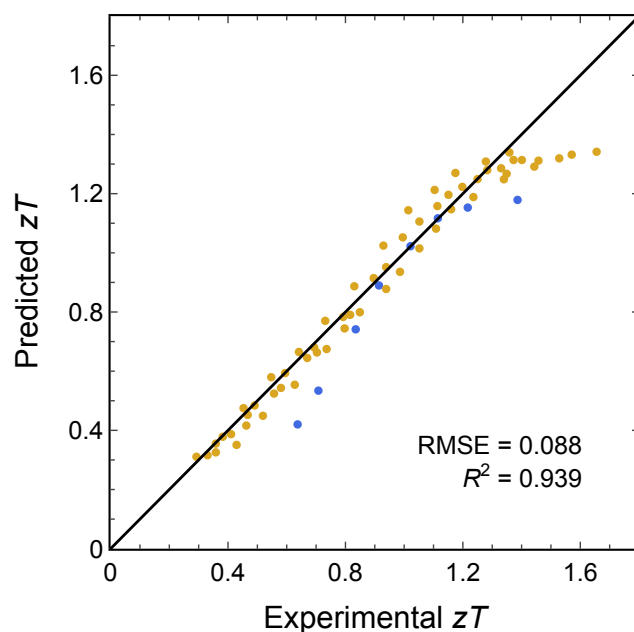

Figure S7. Predicted versus experimental  $zT$  values for high-performance *n*-type skutterudites containing multiple fillers. Systems from Ref. [4] (blue) and Ref. [5] (yellow) show agreement with model predictions. These compounds incorporate 3 or 4 different rattlers with distinct resonant frequencies, maximizing phonon scattering.

## References

- [1] Y. Wang, J. Wang, X. Xu, Y. Wang, B. Jia, S. Li, K. Nielsch and J. He, *Adv. Energy Mater.*, 2026, 16, e05077.
- [2] J. Salvador, J. Yang, H. Wang and X. Shi, *J. Appl. Phys.*, 2010, 107, 043705.
- [3] D. Qin, W. Shi, X. Wang, C. Zou, C. Shang, X. Cui, H. Kang, Y. Lu and J. Sui, *Inorg. Chem. Front.*, 2024, 11, 1724–1732.
- [4] G. Rogl, A. Grytsiv, K. Yubuta, S. Puchegger, E. Bauer, C. Raju, R. Mallik and P. Rogl, *Amer. Mineral.*, 2015, 95, 201–211
- [5] X. Shi, J. Yang, J. R. Salvador, M. Chi, J. Y. Cho, H. Wang, S. Bai, J. Yang, W. Zhang and L. Chen, *J. Am. Chem. Soc.*, 2011, 133, 7837–7846.
